# Supplementary material for: A fluorescent colorimetric vanillin di-Schiff base chemosensor for detection of Cu(ii) and isolation of trinuclear Cu(ii)–dihydrazide
Source: Royal Society of Chemistry journal article supplement (doi:10.1039/d1ma01227d), 2022-01-01
Supplement: d1ma01227d1.pdf [file d1ma01227d1.pdf]

Supplementary Information

# A fluorescent colorimetric vaniline di-Schiff base chemosensor for detection of Cu(II) and Isolation of trinuclear Cu(II)-dihydrazide

Memansahu, Amit Kumar Manna and Goutam K. Patra\*

Department of Chemistry, Guru Ghasidas Vishwavidyalaya, Bilaspur

(C.G)

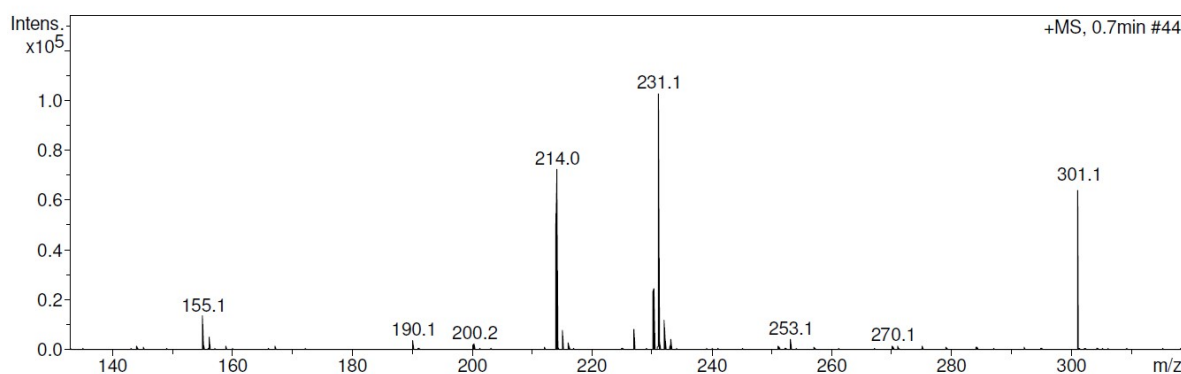

Fig. S1. ESI-Mass Spectra of H<sub>2</sub>L.

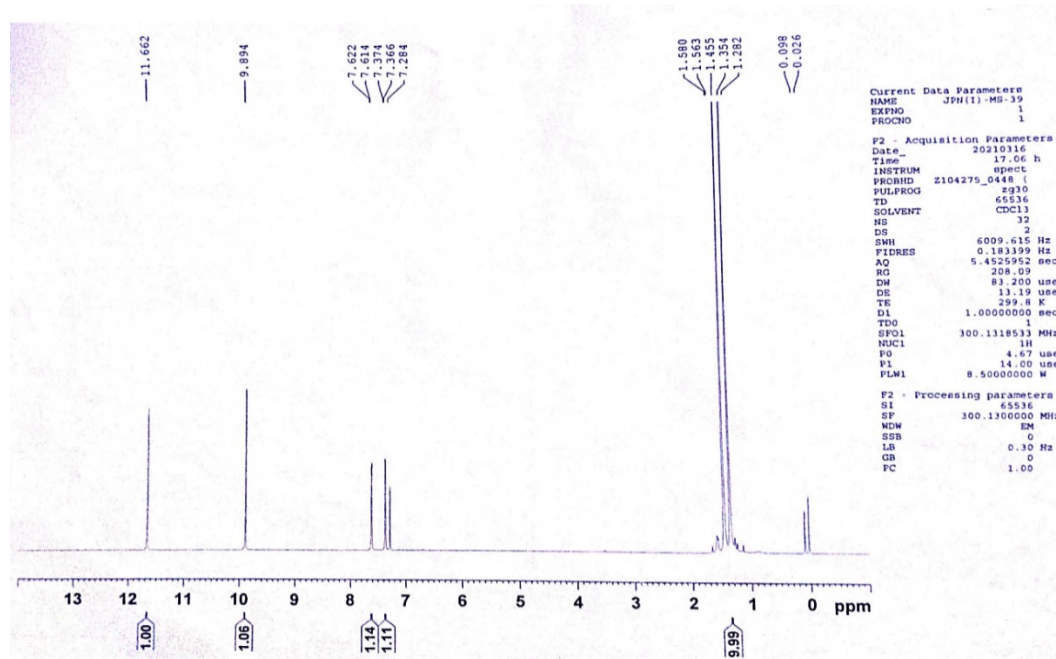

Fig. S2. <sup>1</sup>H NMR Spectra of L in CDCl<sub>3</sub>.

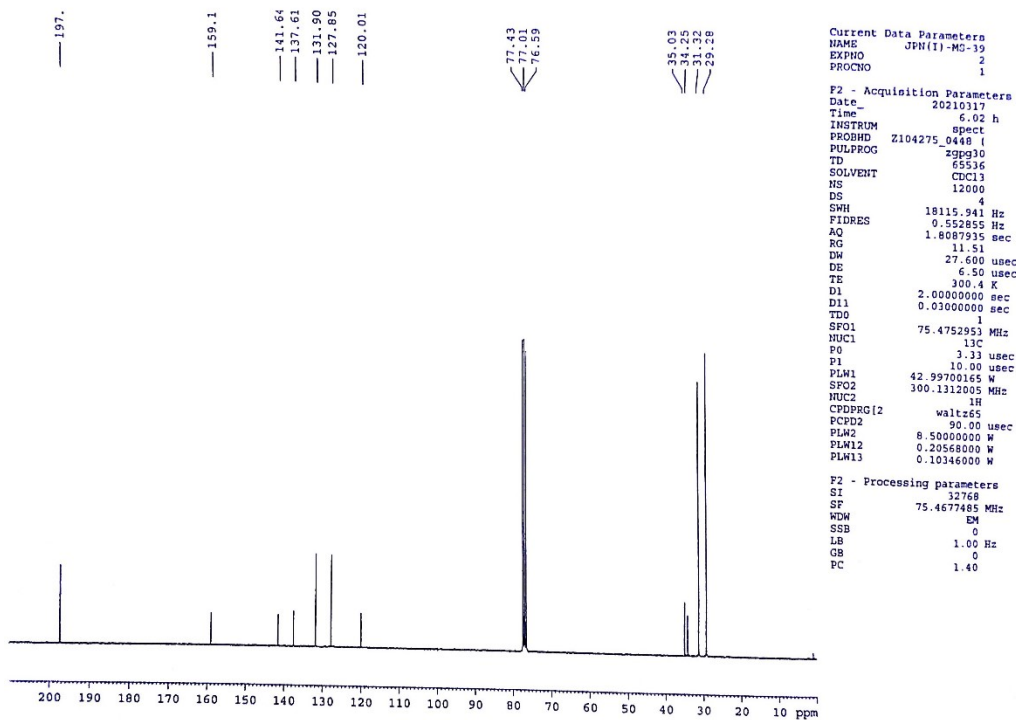

Fig. S3.  $^{13}\text{C}$ -NMR Spectra of L in  $\text{CDCl}_3$ .

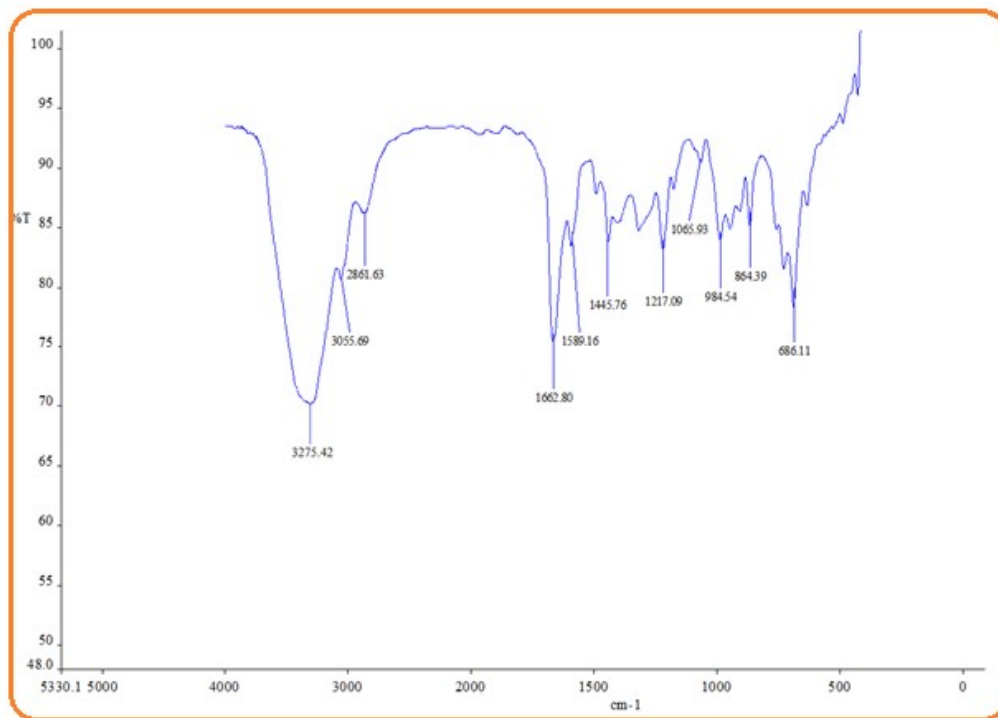

Fig. S4. FTIR spectra of L.

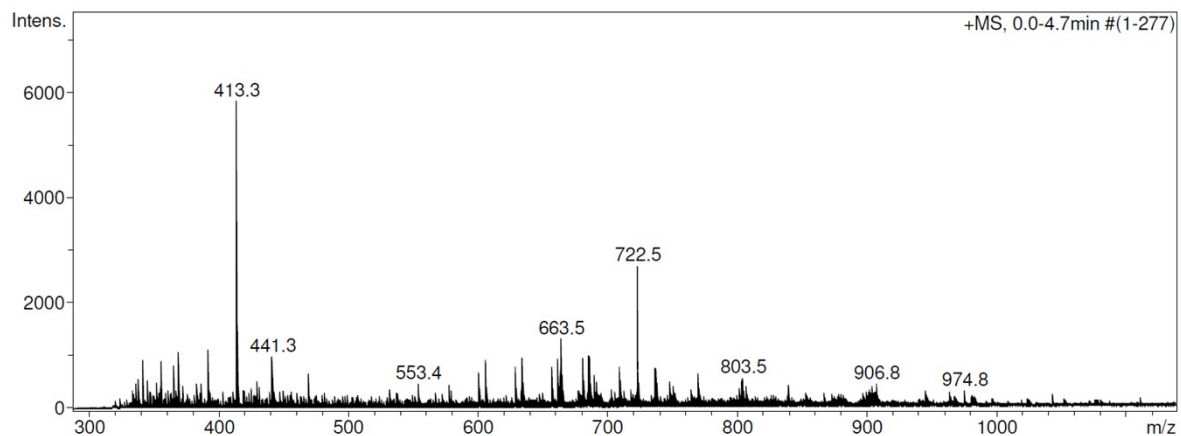

**Fig. S5.** ESI-Mass Spectra of L+ Cu<sup>2+</sup> adduct (1).

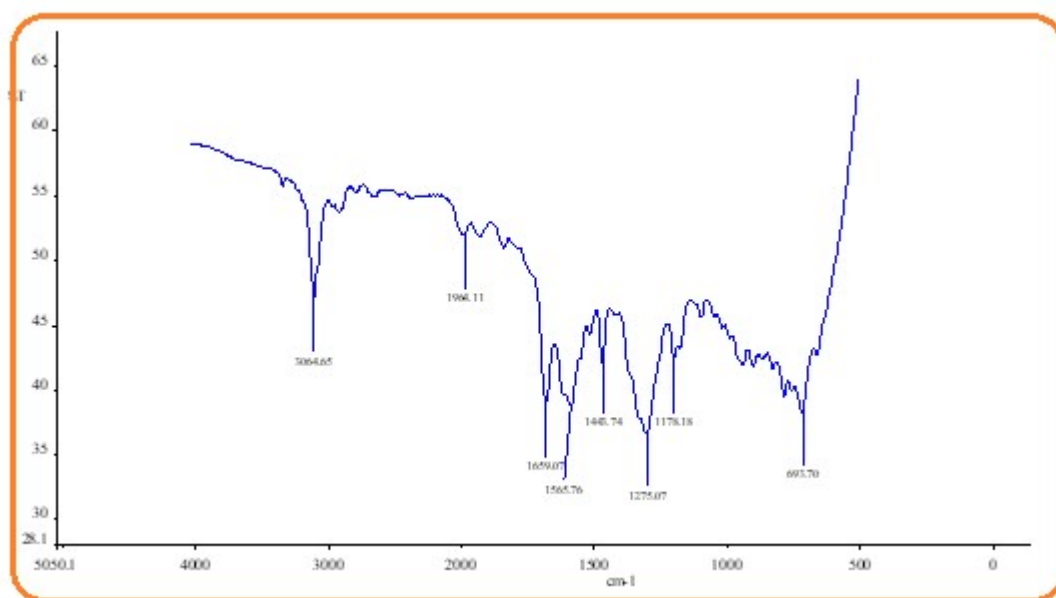

**Fig. S6.** FTIR Spectra of L+ Cu<sup>2+</sup> adduct (1).

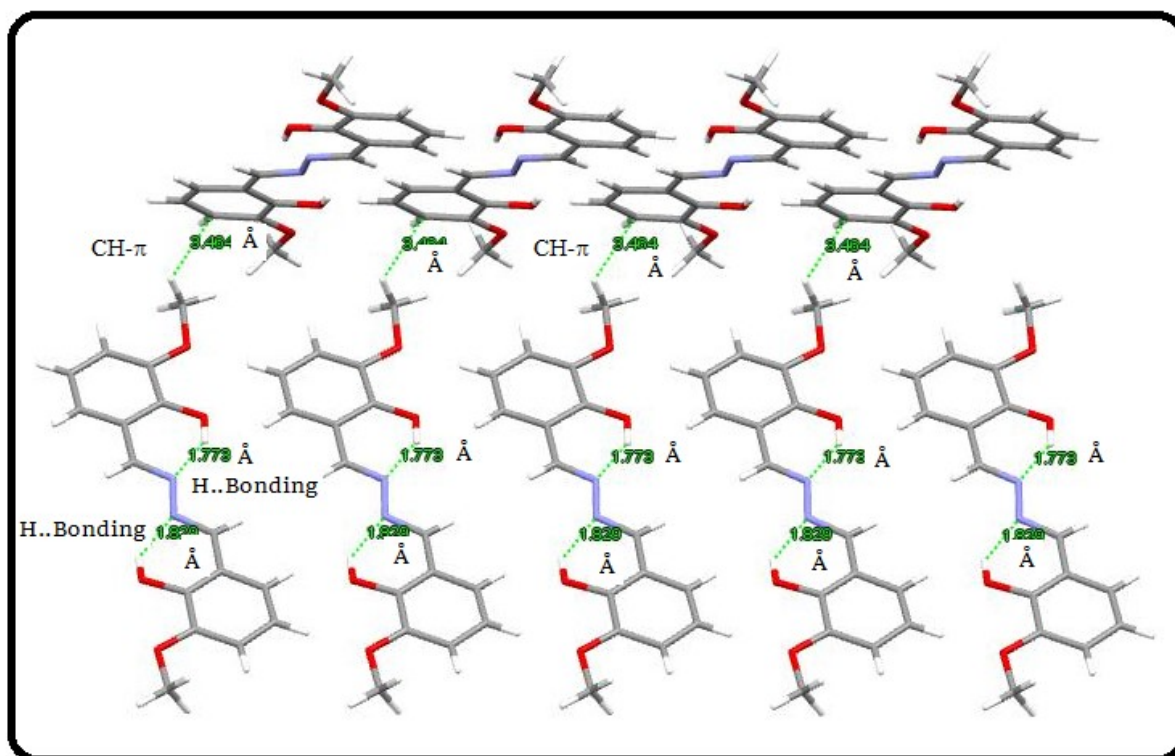

**Fig. S7.** H-bonding (distances  $1.773 \text{ \AA}$  and  $1.829 \text{ \AA}$ ) and  $CH-\pi$  stacking interactions (distance  $3.464 \text{ \AA}$ ) in the crystal structure of  $H_2L$ .

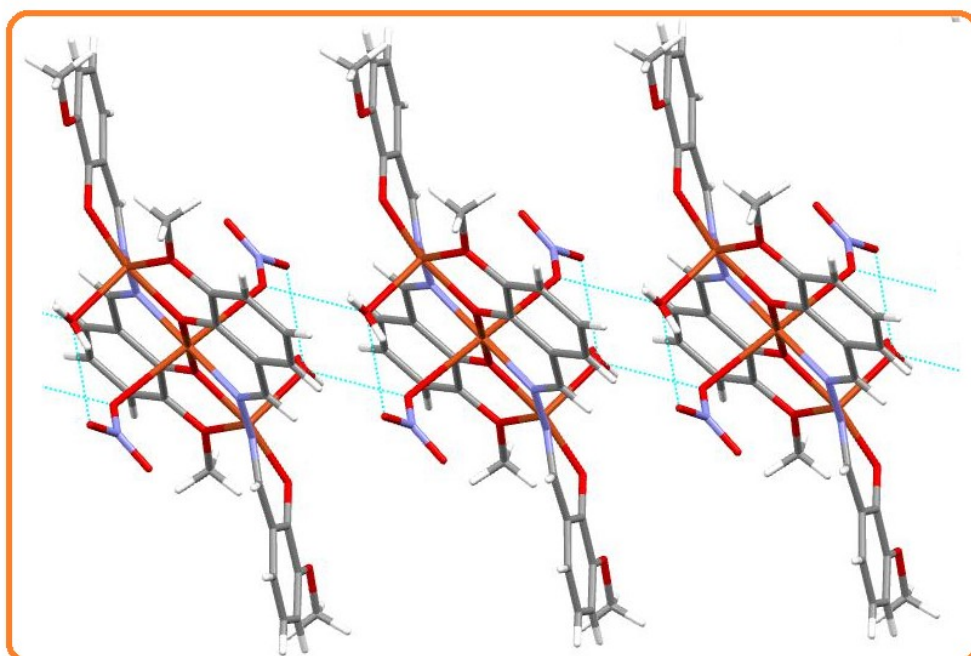

**Fig. S8.**  $\pi-\pi$  stacking interactions in the crystal structure of **1**.

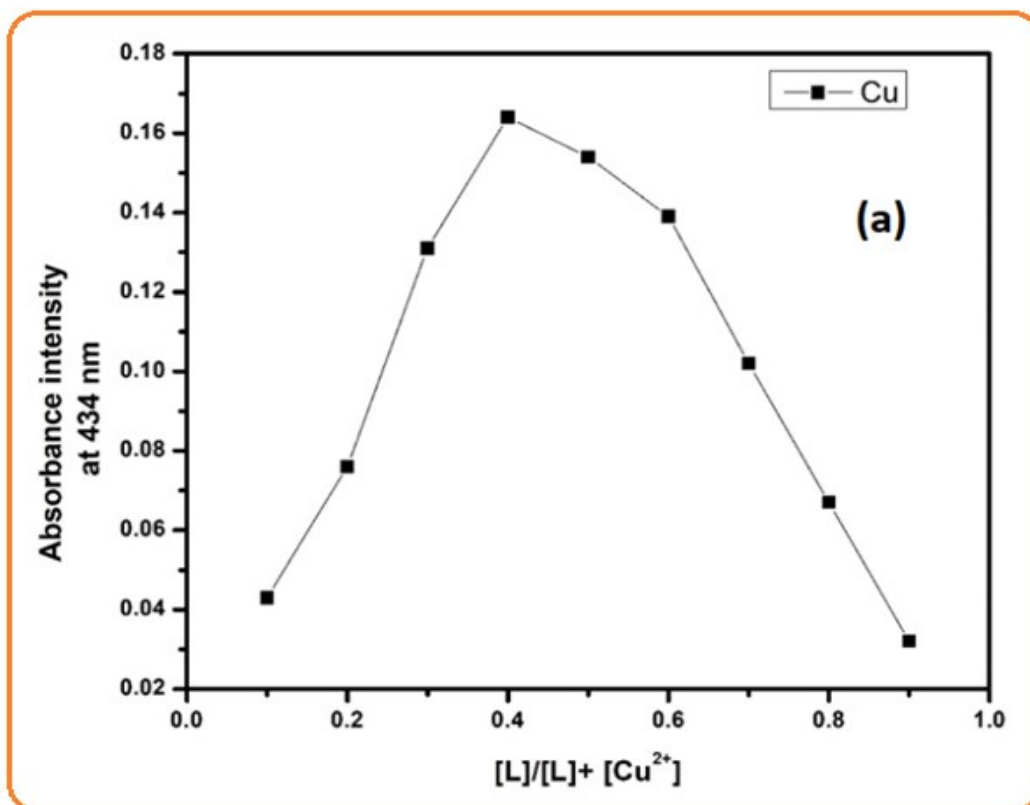

Fig. S9. Job's plot measurements

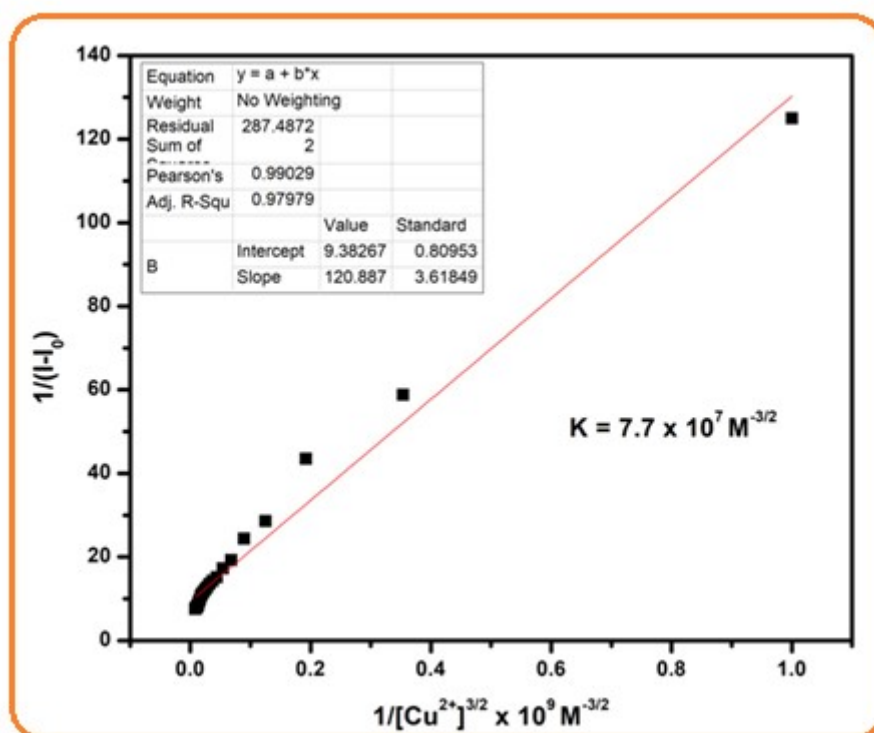

Fig. S10. Stability constant of L-Cu<sup>2+</sup>
